# Supplementary material for: Chimeric Antigen Receptor T Cells in Glioblastoma—Current Concepts and Promising Future
Source: MDPI journal article supplement (doi:10.3390/cells12131770), 2023-07-03
Supplement: s1 [file s1]

## Supplementary Material

**Table S1.** Targets used in preclinical in clinical studies and their characteristics.

| Target         | Characteristics                                                                                                                                                                                                                                                                                                                                                                                                                     | Preclinical Studies                  | Clinical Studies |
|----------------|-------------------------------------------------------------------------------------------------------------------------------------------------------------------------------------------------------------------------------------------------------------------------------------------------------------------------------------------------------------------------------------------------------------------------------------|--------------------------------------|------------------|
| IL13R $\alpha$ | <ul style="list-style-type: none"> <li>Present in over 75% of GBMs and is associated with increased tumor invasiveness and progression, and thus a poorer prognosis [117,118]</li> <li>The receptor is overexpressed in GBM but not in normal tissue [119]</li> </ul>                                                                                                                                                               | [28–32,41,103]                       | [57–59]          |
| EGFRvIII       | <ul style="list-style-type: none"> <li>Transmembrane protein which influences the migration of neuronal stem cells during development and promotes cellular proliferation [120]</li> <li>Wild-type EGFR is not detected in normal brain tissue, but is amplified in about 40% of GBM [120]</li> <li>The EGFR gene exhibits various mutations, e.g., the EGFRvIII, which can be found in about 50% of GBM patients [5,19]</li> </ul> | [33–35,37–40,97,103,107,108,121,122] | [60,61]          |
| HER2           | <ul style="list-style-type: none"> <li>Receptor tyrosine kinase, which is overexpressed in many human cancers, such as breast cancer, ovarian cancer and in 76% of primary GBM lines [24,75]</li> <li>Not tumor specific, expressed in normal tissue [27]</li> </ul>                                                                                                                                                                | [30,31]                              | [62]             |
| EphA2          | <ul style="list-style-type: none"> <li>Strongly overexpressed in 60% of GBMs, as well as GCS and at low levels on adult proliferating epithelial cells and brain tissue [24,115]</li> </ul>                                                                                                                                                                                                                                         | [31,41,42]                           | [63]             |
| NKG2DL         | <ul style="list-style-type: none"> <li>Natural killer group, member D ligands (NKGD2L) is upregulated in infected and tumor cells, while the corresponding receptor is expressed by NK cells and CD8+ cells [123]</li> <li>Can be induced in non-tumoral tissue in case of unphysiological cell stress or inflammation [124,125]</li> </ul>                                                                                         | [45,46]                              |                  |
| GD2            | <ul style="list-style-type: none"> <li>Disialoganglioside, which is highly expressed in GBM [49]</li> </ul>                                                                                                                                                                                                                                                                                                                         | [47–49]                              | [64,65]          |
| B7-H3          | <ul style="list-style-type: none"> <li>Immune checkpoint molecule, which binds to about 70% of neuroepithelial tumors without binding normal glia or tissue [27]</li> </ul>                                                                                                                                                                                                                                                         | [50,51]                              |                  |
| CD70           | <ul style="list-style-type: none"> <li>Transmembrane protein and member of the TNF-family, which is not present in normal peripheral and brain tissues, but is overexpressed in about 92% of tested cell lines in GBM and is associated with T cell dysfunction and apoptosis [24,115]</li> </ul>                                                                                                                                   | [53–55,93]                           |                  |
| CD133          | <ul style="list-style-type: none"> <li>Marker for self-renewing GSCs [27]</li> </ul>                                                                                                                                                                                                                                                                                                                                                | [56]                                 |                  |
